# Supplementary material for: Two novel copper(II) supramolecular complexes: synthesis, crystal structures, and Hirshfeld surface analysis
Source: publisher site journal article supplement (doi:10.1515/zkri-2025-0031), 2025-09-02

Structure factors have been supplied for datablock(s) shelx

No syntax errors found. CIF dictionary Interpreting this report

|                 |                |                    |                |  |
|-----------------|----------------|--------------------|----------------|--|
| Bond precision: | C-C = 0.0043 Å | Wavelength=0.71073 |                |  |
| Cell:           | a=11.7258 (13) | b=12.8692 (14)     | c=12.6384 (14) |  |
|                 | alpha=90       | beta=96.173 (2)    | gamma=90       |  |
| Temperature:    | 273 K          |                    |                |  |

Correction method= # Reported T Limits: Tmin=0.794 Tmax=0.817  
AbsCorr = ?

|                               |                                 |
|-------------------------------|---------------------------------|
| R(reflections)= 0.0376( 2929) | wR2(reflections)= 0.1003( 3306) |
| S = 1.089                     | Npar= 275                       |

---

The following ALERTS were generated. Each ALERT has the format

**test-name\_ALERT\_alert-type\_alert-level.**

Click on the hyperlinks for more details of the test.

---

### Alert level C

|                   |                                                      |           |             |
|-------------------|------------------------------------------------------|-----------|-------------|
| PLAT052_ALERT_1_C | Info on Absorption Correction Method                 | Not Given | Please Do ! |
| PLAT094_ALERT_2_C | Ratio of Maximum / Minimum Residual Density ....     | 2.61      | Report      |
| PLAT230_ALERT_2_C | Hirshfeld Test Diff for O4 --C7 .                    | 7.0       | s.u.        |
| PLAT906_ALERT_3_C | Large K Value in the Analysis of Variance .....      | 2.406     | Check       |
| PLAT911_ALERT_3_C | Missing FCF Refl Between Thmin & STh/L= 0.595        | 31        | Report      |
|                   | 2 0 0, 12 5 0, -12 3 1, -13 4 1, -5 9 1, 7 9 1,      |           |             |
|                   | 8 11 1, -4 6 2, -5 7 2, 8 10 2, 8 11 3, -4 9 4,      |           |             |
|                   | -3 9 4, -5 10 4, -4 10 4, -5 11 4, -4 10 5, -2 11 5, |           |             |
|                   | -1 7 6, -2 9 6, -2 10 6, -1 10 6, 6 10 6, -3 12 6,   |           |             |
|                   | -7 3 7, 0 10 7, 0 11 7, 1 0 9, -4 0 12, -6 0 14,     |           |             |
|                   | -5 1 14,                                             |           |             |

---

### Alert level G

|                   |                                                      |              |        |
|-------------------|------------------------------------------------------|--------------|--------|
| PLAT002_ALERT_2_G | Number of Distance or Angle Restraints on AtSite     | 3            | Note   |
| PLAT003_ALERT_2_G | Number of Uiso or U(i,j) Restrained non-H-Atoms      | 2            | Report |
| PLAT007_ALERT_5_G | Number of Unrefined Donor-H Atoms .....              | 5            | Report |
|                   | H1B H2A H2B H3A H3B                                  |              |        |
| PLAT172_ALERT_4_G | The CIF-Embedded .res File Contains DFIX Records     | 2            | Report |
| PLAT177_ALERT_4_G | The CIF-Embedded .res File Contains DELU Records     | 1            | Report |
| PLAT178_ALERT_4_G | The CIF-Embedded .res File Contains SIMU Records     | 1            | Report |
| PLAT188_ALERT_3_G | A Non-default SIMU Restraint Value has been used     | 0.0100       | Report |
| PLAT192_ALERT_3_G | A Non-default DELU Restraint Value for SecondPar     | 0.0200       | Report |
| PLAT199_ALERT_1_G | Reported _cell_measurement_temperature ..... (K)     | 273          | Check  |
| PLAT200_ALERT_1_G | Reported _diffrn_ambient_temperature ..... (K)       | 273          | Check  |
| PLAT790_ALERT_4_G | Centre of Gravity not Within Unit Cell: Resd. #      | 2            | Note   |
|                   | H2 O                                                 |              |        |
| PLAT790_ALERT_4_G | Centre of Gravity not Within Unit Cell: Resd. #      | 3            | Note   |
|                   | H2 O                                                 |              |        |
| PLAT794_ALERT_5_G | Tentative Bond Valency for Cu1 (II) .                | 2.26         | Info   |
| PLAT860_ALERT_3_G | Number of Least-Squares Restraints .....             | 10           | Note   |
| PLAT883_ALERT_1_G | Absent Datum for _atom_sites_solution_primary ..     | Please Do !  |        |
| PLAT899_ALERT_4_G | SHELXL2018 is Outdated and Succeeded by SHELXL       | 2019/3       | Note   |
| PLAT909_ALERT_3_G | Percentage of I>2sig(I) Data at Theta(Max) Still     | 77%          | Note   |
| PLAT933_ALERT_2_G | Number of HKL-OMIT Records in Embedded .res File     | 4            | Note   |
|                   | -12 3 1, -5 10 4, -13 4 1, 6 10 6,                   |              |        |
| PLAT941_ALERT_3_G | Average HKL Measurement Multiplicity .....           | 2.8          | Low    |
| PLAT965_ALERT_2_G | The SHELXL WEIGHT Optimisation has not Converged     | Please Check |        |
| PLAT967_ALERT_5_G | Note: Two-Theta Cutoff Value in Embedded .res ..     | 50.0         | Degree |
| PLAT969_ALERT_5_G | The 'Henn et al.' R-Factor-gap value .....           | 2.993        | Note   |
|                   | Predicted wR2: Based on SigI**2 3.35 or SHELX Weight | 9.21         |        |
| PLAT978_ALERT_2_G | Number C-C Bonds with Positive Residual Density.     | 3            | Info   |

---

- 0 **ALERT level A** = Most likely a serious problem - resolve or explain  
0 **ALERT level B** = A potentially serious problem, consider carefully  
5 **ALERT level C** = Check. Ensure it is not caused by an omission or oversight  
23 **ALERT level G** = General information/check it is not something unexpected

4 ALERT type 1 CIF construction/syntax error, inconsistent or missing data

7 ALERT type 2 Indicator that the structure model may be wrong or deficient  
7 ALERT type 3 Indicator that the structure quality may be low  
6 ALERT type 4 Improvement, methodology, query or suggestion  
4 ALERT type 5 Informative message, check

---

---

It is advisable to attempt to resolve as many as possible of the alerts in all categories. Often the minor alerts point to easily fixed oversights, errors and omissions in your CIF or refinement strategy, so attention to these fine details can be worthwhile. In order to resolve some of the more serious problems it may be necessary to carry out additional measurements or structure refinements. However, the purpose of your study may justify the reported deviations and the more serious of these should normally be commented upon in the discussion or experimental section of a paper or in the "special\_details" fields of the CIF. checkCIF was carefully designed to identify outliers and unusual parameters, but every test has its limitations and alerts that are not important in a particular case may appear. Conversely, the absence of alerts does not guarantee there are no aspects of the results needing attention. It is up to the individual to critically assess their own results and, if necessary, seek expert advice.

### **Publication of your CIF in IUCr journals**

A basic structural check has been run on your CIF. These basic checks will be run on all CIFs submitted for publication in IUCr journals (*Acta Crystallographica*, *Journal of Applied Crystallography*, *Journal of Synchrotron Radiation*); however, if you intend to submit to *Acta Crystallographica Section C* or *E* or *IUCrData*, you should make sure that full publication checks are run on the final version of your CIF prior to submission.

### **Publication of your CIF in other journals**

Please refer to the *Notes for Authors* of the relevant journal for any special instructions relating to CIF submission.

---

**PLATON version of 11/11/2024; check.def file version of 11/11/2024**

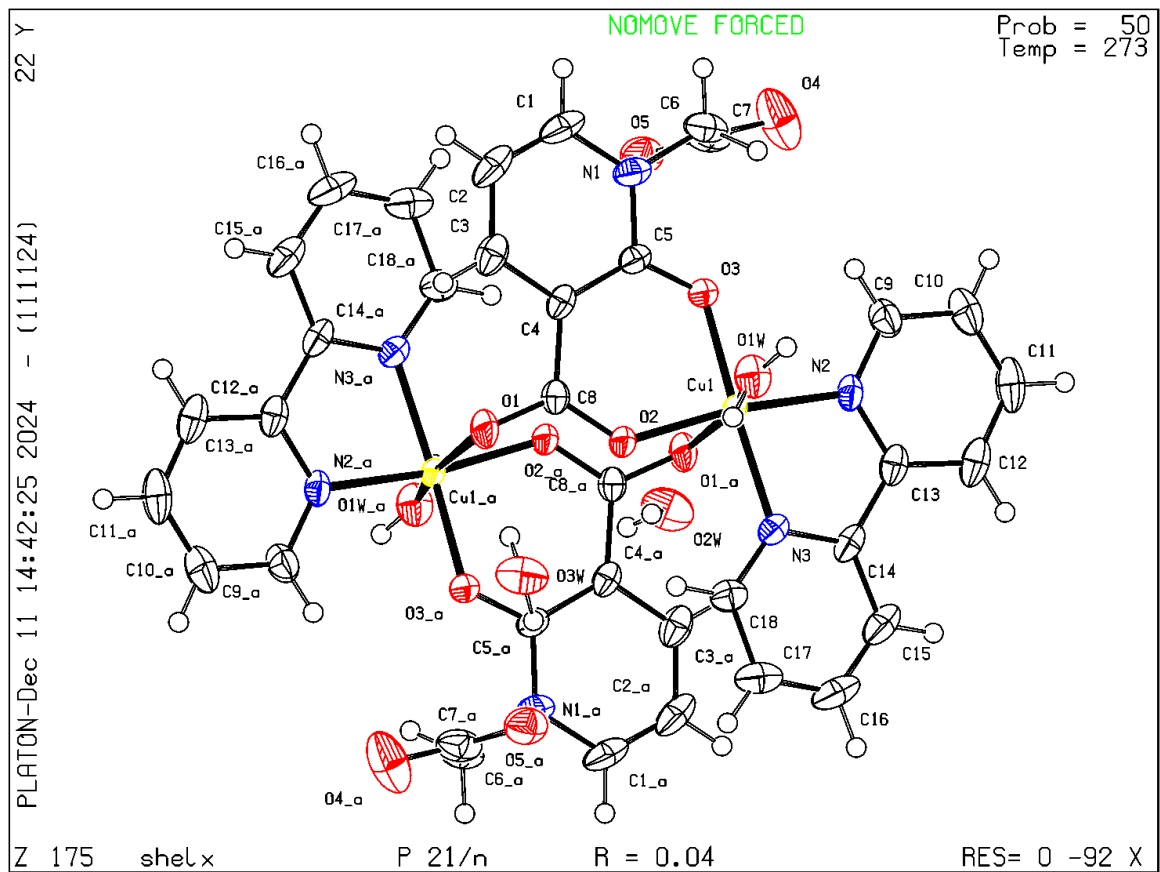

Supplement: Supplementary file 1 [file j_zkri-2025-0031_suppl_003.pdf]
