# Supplementary material for: Two novel copper(II) supramolecular complexes: synthesis, crystal structures, and Hirshfeld surface analysis
Source: publisher site journal article supplement (doi:10.1515/zkri-2025-0031), 2025-09-02
Supplement: Supplementary file 1 [file j_zkri-2025-0031_suppl_001.docx]

Syntheses and structures of two new complexes

Electronic Supporting Information (ESI)

Two novel copper(II) supramolecular complexes: synthesis, crystal structures, and Hirshfeld surface analysis

Yuzhu Song1,2, Chang Xu2, Tianyu Bai2, Xiuyan Wang1,2*

1Key Laboratory of Preparation and Applications of Environmental Friendly Materials, Jilin Normal University, Ministry of Education, Changchun 130103, China

2Department of Chemistry, Jilin Normal University, Siping 136000, China

* Correspondence author (e-mail: [wangxiuyanjlnu2004@163.com](mailto:wangxiuyanjlnu2004@163.com))

## Hirshfeld surface analysis of complex (1)


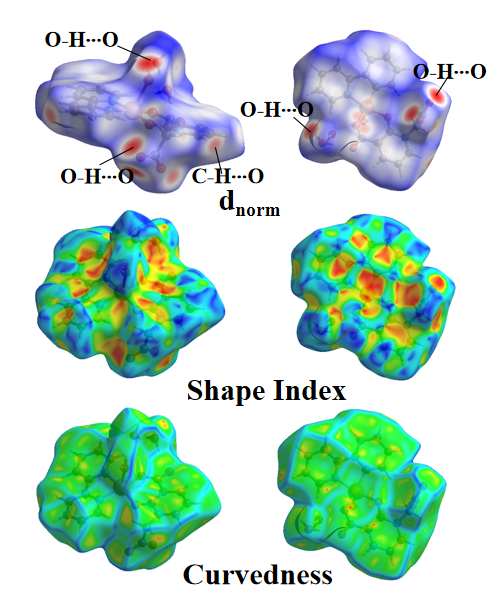


**Figure S1.** Surface distribution situation of complex **(1)**.


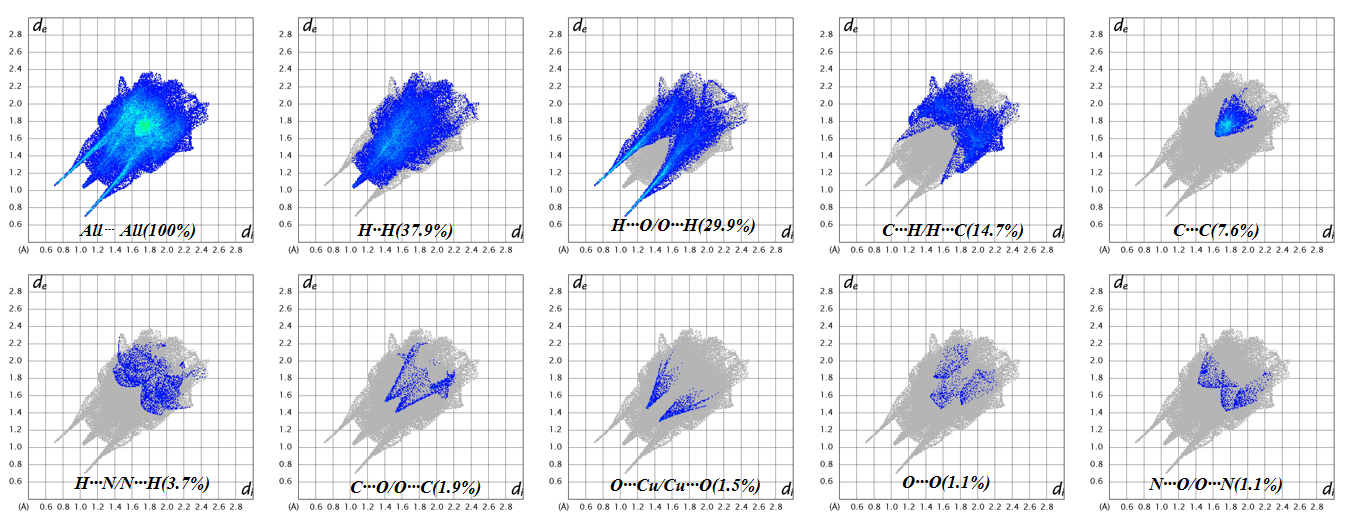


**Figure S2.** The 2D fingerprint plot of complex **(1)**.
